# Supplementary material
Source: PubMed Central journal article supplement (PMC3260070)
Supplement: supp_111.019620_ajcn019620-Table1.pdf [file supp_111.019620_ajcn019620-Table1.pdf]

**Supplementary Table 1.** Association between television viewing, overall sitting and mortality adjusted for BMI at study baseline among 240,819 participants reporting no heart disease or cancer at baseline – NIH-AARP Diet and Health Study.

| <b>Hazard ratios (95% confidence intervals)</b> |               |                   |                   |                   |                   |                          |
|-------------------------------------------------|---------------|-------------------|-------------------|-------------------|-------------------|--------------------------|
| <b><i>All-cause Mortality</i></b>               |               |                   |                   |                   |                   |                          |
| <b>Television viewing (hrs/d)</b>               | <b>&lt; 1</b> | <b>1 to 2</b>     | <b>3 to 4</b>     | <b>5 to 6</b>     | <b>7+</b>         | <b>P<sub>trend</sub></b> |
| Deaths                                          | 801           | 4,054             | 7,622             | 3,278             | 1,289             |                          |
| Multivariable model C <sup>1</sup>              | 1.00          | 1.02 (0.94, 1.10) | 1.11 (1.03, 1.19) | 1.24 (1.15, 1.35) | 1.51 (1.38, 1.65) | < 0.001                  |
| <b>Overall sitting (hrs/d)</b>                  | <b>&lt; 3</b> | <b>3 to 4</b>     | <b>5 to 6</b>     | <b>7 to 8</b>     | <b>9+</b>         | <b>P<sub>trend</sub></b> |
| Deaths                                          | 3,310         | 5,029             | 4,851             | 2,362             | 1,492             |                          |
| Multivariable model C <sup>1</sup>              | 1.00          | 0.98 (0.94, 1.02) | 1.01 (0.97, 1.06) | 0.99 (0.94, 1.05) | 1.14 (1.07, 1.21) | 0.001                    |
| <b><i>Cardiovascular Mortality</i></b>          |               |                   |                   |                   |                   |                          |
| <b>Television viewing (hrs/d)</b>               | <b>&lt; 1</b> | <b>1 to 2</b>     | <b>3 to 4</b>     | <b>5 to 6</b>     | <b>7+</b>         | <b>P<sub>trend</sub></b> |
| Deaths                                          | 212           | 1,056             | 2,084             | 928               | 404               |                          |
| Multivariable model C <sup>1</sup>              | 1.00          | 0.97 (0.83, 1.12) | 1.08 (0.94, 1.25) | 1.23 (1.06, 1.44) | 1.63 (1.37, 1.93) | < 0.001                  |
| <b>Overall sitting (hrs/d)</b>                  | <b>&lt; 3</b> | <b>3 to 4</b>     | <b>5 to 6</b>     | <b>7 to 8</b>     | <b>9+</b>         | <b>P<sub>trend</sub></b> |
| Deaths                                          | 931           | 1,398             | 1,346             | 611               | 398               |                          |
| Multivariable model C <sup>1</sup>              | 1.00          | 0.96 (0.88, 1.04) | 0.99 (0.91, 1.08) | 0.91 (0.82, 1.01) | 1.06 (0.94, 1.19) | 0.968                    |
| <b><i>Cancer Mortality</i></b>                  |               |                   |                   |                   |                   |                          |
| <b>Television viewing (hrs/d)</b>               | <b>&lt; 1</b> | <b>1 to 2</b>     | <b>3 to 4</b>     | <b>5 to 6</b>     | <b>7+</b>         | <b>P<sub>trend</sub></b> |
| Deaths                                          | 388           | 1,954             | 3,483             | 1,362             | 465               |                          |
| Multivariable model C <sup>1</sup>              | 1.00          | 1.03 (0.92, 1.15) | 1.07 (0.96, 1.19) | 1.11 (0.99, 1.25) | 1.18 (1.03, 1.36) | 0.002                    |
| <b>Overall sitting (hrs/d)</b>                  | <b>&lt; 3</b> | <b>3 to 4</b>     | <b>5 to 6</b>     | <b>7 to 8</b>     | <b>9+</b>         | <b>P<sub>trend</sub></b> |
| Deaths                                          | 1,474         | 2,315             | 2,193             | 1,038             | 632               |                          |
| Multivariable model C <sup>1</sup>              | 1.00          | 1.02 (0.95, 1.08) | 1.03 (0.97, 1.10) | 0.98 (0.91, 1.07) | 1.10 (1.00, 1.21) | 0.268                    |

**Mortality from Other Causes**

| <b>Television viewing (hrs/d)</b>  | <b>&lt; 1</b> | <b>1 to 2</b>     | <b>3 to 4</b>     | <b>5 to 6</b>     | <b>7+</b>         | <b>P<sub>trend</sub></b> |
|------------------------------------|---------------|-------------------|-------------------|-------------------|-------------------|--------------------------|
| Deaths                             | 201           | 1,044             | 2055              | 988               | 420               |                          |
| Multivariable model C <sup>1</sup> | 1.00          | 1.06 (0.91, 1.23) | 1.20 (1.04, 1.39) | 1.52 (1.30, 1.77) | 2.00 (1.68, 2.38) | < 0.001                  |
| <br>                               |               |                   |                   |                   |                   |                          |
| <b>Overall sitting (hrs/d)</b>     | <b>&lt; 3</b> | <b>3 to 4</b>     | <b>5 to 6</b>     | <b>7 to 8</b>     | <b>9+</b>         | <b>P<sub>trend</sub></b> |
| Deaths                             | 905           | 1,316             | 1,312             | 713               | 462               |                          |
| Multivariable model C <sup>1</sup> | 1.00          | 0.94 (0.86, 1.02) | 1.00 (0.92, 1.09) | 1.10 (0.99, 1.21) | 1.29 (1.15, 1.45) | < 0.001                  |

---

---

<sup>1</sup>Model C: adjusted for age (years), sex (male, female), race (white, black, other, missing), education (< 12 years, high school graduate, some college, college graduate, missing), smoking history (never, quit ≤ 20 cigarettes/d, quit > 20 cigarettes/d, current ≤ 20 cigarettes/d, current > 20 cigarettes/d, unknown), diet quality (quintiles), MVPA (never/rarely, < 1, 1-3, 4-7, 7+ hrs/wk), and BMI (kg/m<sup>2</sup>)
